# Supplementary material for: Click-based porous inorganic–organic hybrid material (PHM) containing cyclophosphazene unit and their application in carbon dioxide capture
Source: Royal Society of Chemistry journal article supplement (doi:10.1039/c4ra05410e), 2014-01-01
Supplement: c4ra05410e1.pdf [file c4ra05410e1.pdf]

# Click-based porous inorganic-organic hybrid materials (PHMs) containing cyclophosphazene units and its application in Carbon dioxide capture

Pawan Rekha,<sup>a</sup> Usharani Sahoo,<sup>a</sup> and Paritosh Mohanty<sup>a\*</sup>

<sup>a</sup>Department of Applied Science and Engineering, IIT Roorkee, Saharanpur Campus, Saharanpur, U.P.-247 001, INDIA, E-mail: [paritosh75@gmail.com](mailto:paritosh75@gmail.com), Fax: +91-1322714311; Tel: +91-1322714338

## EXPERIMENTAL SECTION

**Materials:** All chemicals used in this study were of analytical reagent grade and used without further purification. Phosphonitrilic chloridetrimer (PNC) (99%, Sigma Adrich), propargylamine (98%, Alfa Aeser), triethylamine (Rankem), p-xylene dibromide (97%, Alfa Aeser), sodium azide (Spectrochem), cupric sulphate pentahydrate (Leonid), L-ascorbic acid (Leonid), N,N-dimethylformamide (DMF) (Fisher Scientific).

### Synthesis of compound I

Compound-I was synthesized by adding a solution of 1 g PNC in 2 ml THF to a solution of 1 ml of propargylamine and 1.6 ml triethyl amine in 10 ml THF. After addition, the reaction mixture was stirred for 4 h at RT. The resulting solution was then filtered and the solvent was stripped off from the filtrate to obtain a crude material. The crude product obtained was extracted using chloroform and water. The organic layer was isolated and dried over anhydrous Na<sub>2</sub>SO<sub>4</sub>, and then chloroform was removed under reduced pressure to obtain the desired product as orange yellow solid. (Yield: 85-90%) <sup>1</sup>H NMR (CDCl<sub>3</sub>, 300MHz): δ 2.18 (6H, NH), δ 2.9 (6H, CH), δ 3.69 (12H, CH<sub>2</sub>) (Figure S1a). <sup>31</sup>P NMR (CDCl<sub>3</sub>, 300MHz): δ 17.91 (Figure S1b). FT-IR (KBr, cm<sup>-1</sup>): 3410, 3371, 3299 (ν N–H), 3200 (νN–H, νC–H), 1406, 1353, 1186, 1085, (ν P–N<sub>ring</sub>), 978, 905, 856, 628 (Figure S2).

### Synthesis of compound II

Compound-II was synthesized by adding 1.9 g of NaN<sub>3</sub> to a solution of 2 g p-xylene dibromide in 40 ml acetone and the reaction mixture was stirred for 12 h at RT. It was filtered and solvent was stripped off from the filtrate to obtain desirable liquid product (Yield: 90%). FT-IR (KBr, cm<sup>-1</sup>): 3340, 3030, 2930, 2875 (ν C–H), 2100 (azide stretch), 1515, 1450, 1345 (δ C–H) (Figure S3).

## Synthesis of PHM-1

In a typical synthesis, to a solution of 1 mmol compound I and 3 mmol compound II dissolved in 40 ml DMF, a solution of freshly prepared  $\text{CuSO}_4 \cdot 5\text{H}_2\text{O}$  (10 mol%) and sodium ascorbate (20 mol%) in 4 ml of water was added. The solution was stirred at 40 °C for 12 h. The compound was obtained as brown powder and dried under vacuum.  $^1\text{H}$  NMR (DMSO):  $\delta$  8.5-7.9 (triazole-H),  $\delta$  7.3-7.1 (Ar-H),  $\delta$  5.7 (CH<sub>2</sub>-NH), 5.3 (CH<sub>2</sub>-Ar), 4.3 (CH<sub>2</sub>-N<sub>3</sub>)  $\delta$  3.9 (NH).  $^{31}\text{P}$  NMR (DMSO):  $\delta$  -0.02. FT-IR (KBr, cm<sup>-1</sup>): 3420 ( $\nu$ N-H), 2925, 2855 ( $\nu$ C-H), 1640 ( $\nu$  triazole ring), 1452 ( $\delta$ C-H), 1330, 1138, 1060, 965, 520 ( $\nu$ P-N<sub>ring</sub>).

## Characterization:

NMR was recorded on Bruker DPX-300 NMR spectrometer. The FT-IR spectra were obtained with the Perkin-Elmer C91158 infrared spectrophotometer in wavelength range of 400 to 4000 cm<sup>-1</sup> using KBr pellet. The microstructural analysis of the PHM-1 was carried out using the FE-SEM MIRA3 TESCAN at the energy of 10 kV. Before analysis, the material was coated with gold by a standard sputtering technique for 60 sec. TEM analysis was done using TECNAIG<sup>2</sup>S, for which sample was prepared by dispersing powder in ethanol followed by placing a drop on a carbon coated copper grid. The XRD pattern was recorded on a Bruker D8 FOCUS X-ray diffractometer using Cu K $\alpha$  radiations ( $\lambda$ =0.15404 nm) with a scanning speed of 2°/minute and measured in the range of 10 to 80° in 2 $\theta$  scale. UV-visible spectrum was recorded on Shimadzu UV-1800 in DMSO at the concentration of 10<sup>-4</sup>M. TG/DTG analysis was performed on EXSTAR TG/DTA 6300 in which the temperature was raised from 25 to 700 °C at heating rate of 10°C/min under nitrogen. The sample weight was continuously recorded as a function of temperature and time. N<sub>2</sub> sorption isotherm was recorded at 77 K using Autosorb-iQ (Quantachrome Instruments). PHM-1 was degassed at 120 °C for 6 h prior to analysis. Specific surface area was calculated by applying BET model within pressure range of P/P<sub>0</sub> 0.05-0.35. The pore size distribution was calculated by DFT method. The pore volume was calculated from the uptake at a relative pressure of 0.99 cm<sup>3</sup>.g<sup>-1</sup>. CO<sub>2</sub> sorption isotherm was recorded at 273 and 298 K using Autosorb-iQ (Quantachrome Instruments).

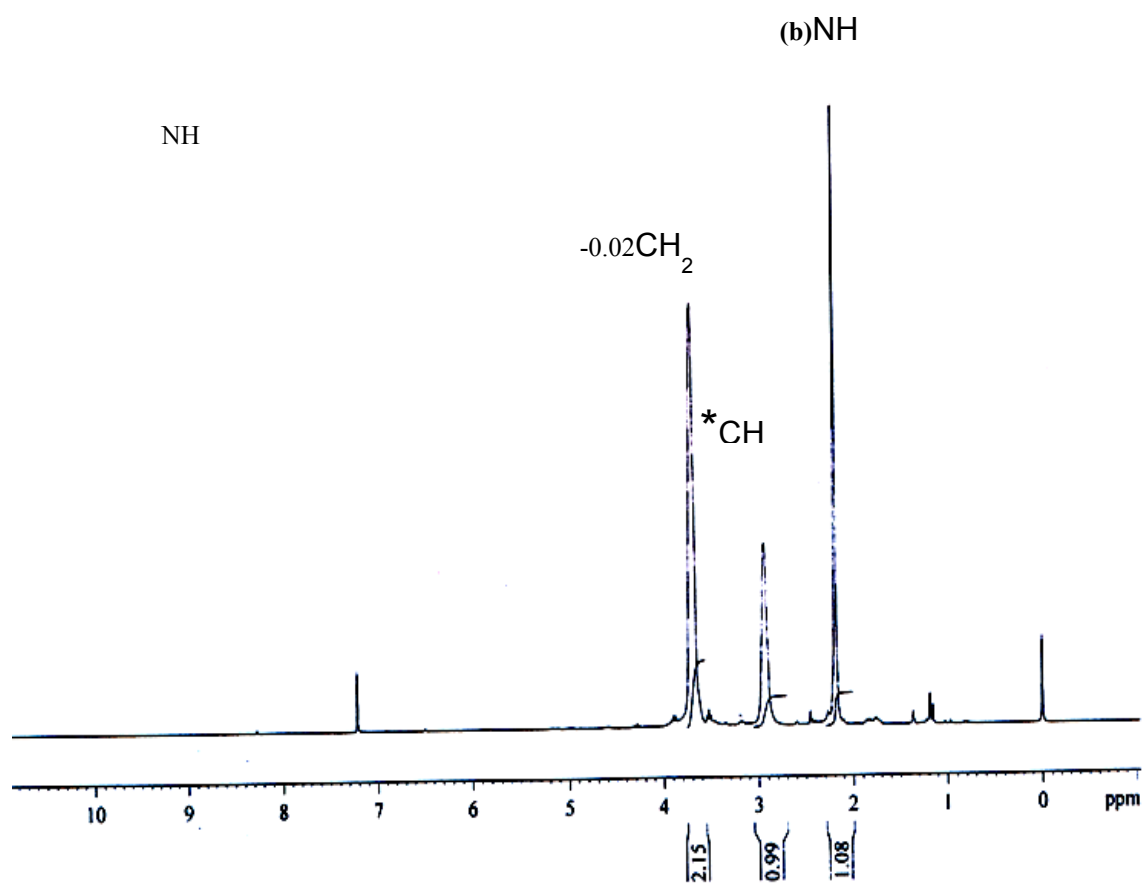

Figure S1a.  $^1\text{H}$  NMR of Compound I.

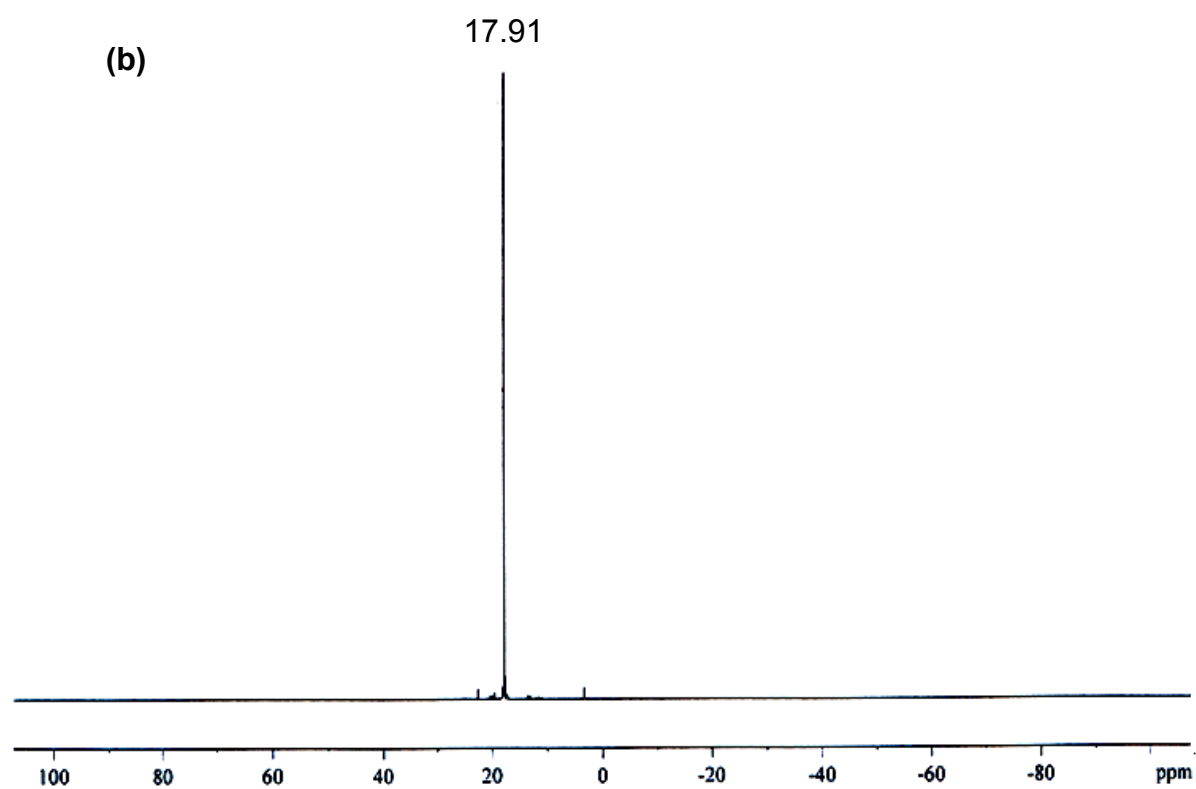

**Figure S1b.  $^{31}\text{P}$  NMR of Compound I.**

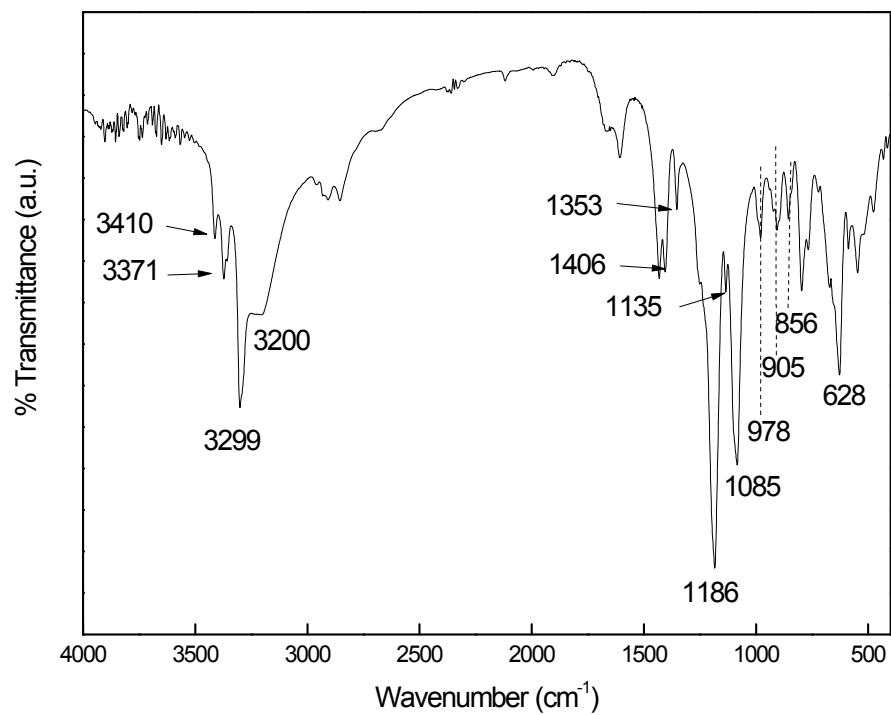

**Figure S2. FT-IR of Compound I.**

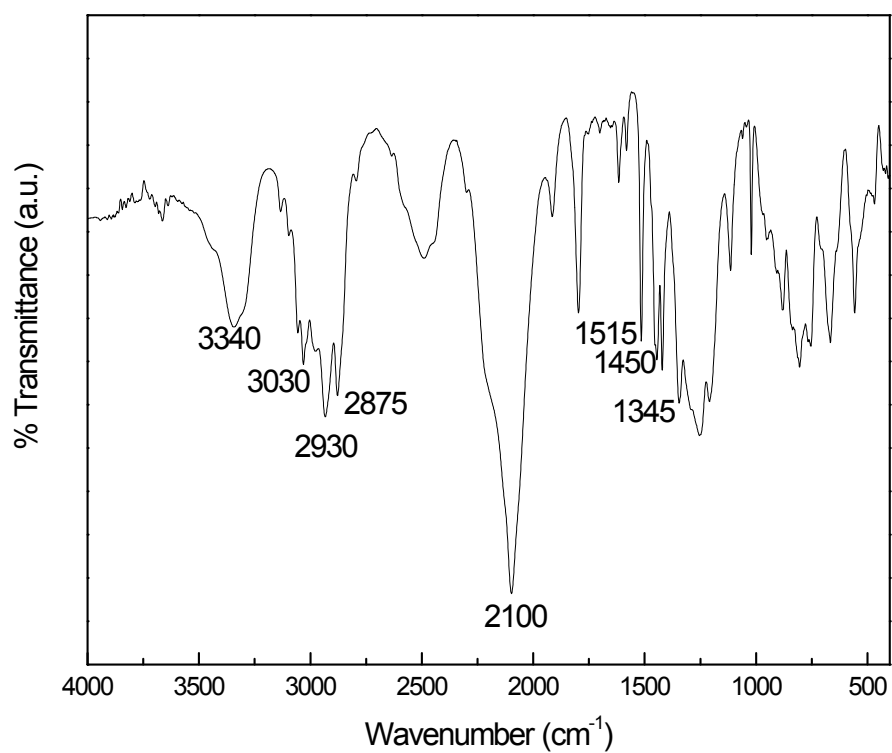

**Figure S3. FT-IR of Compound II.**

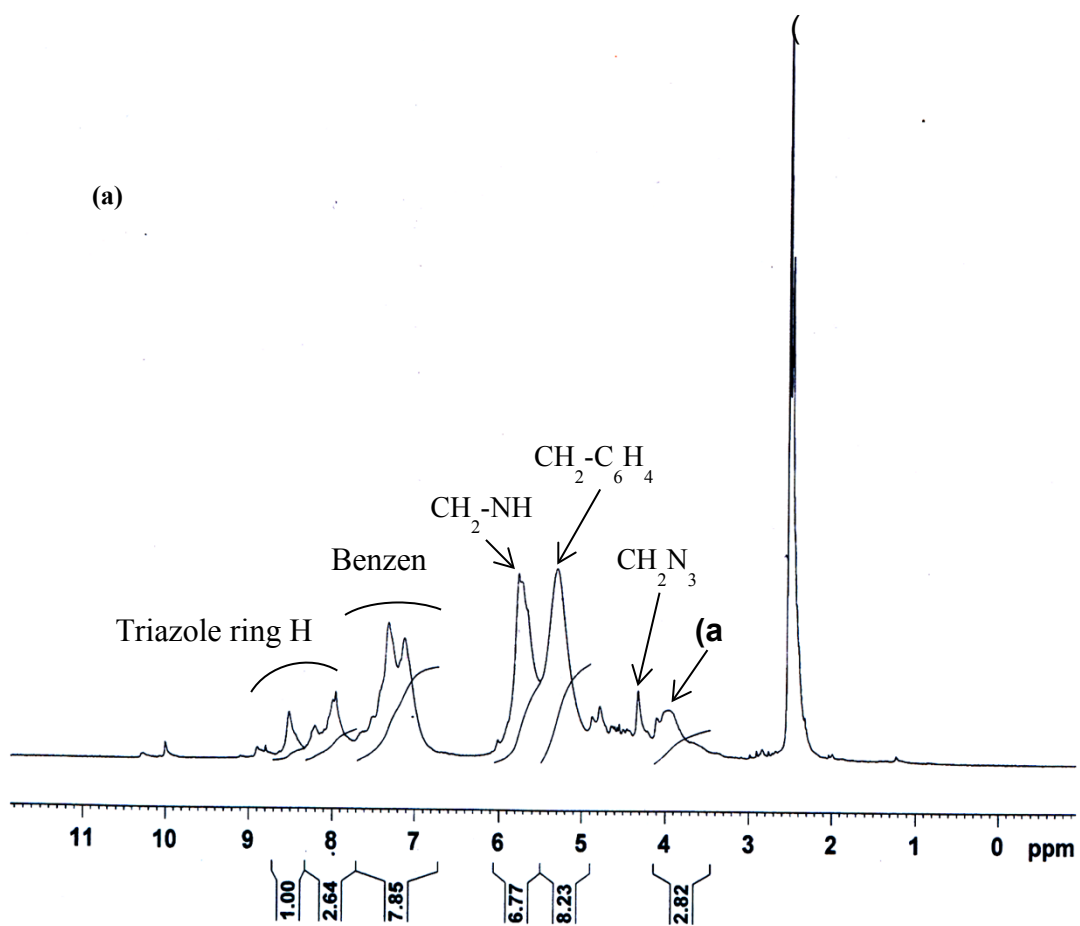

Figure S4a.  $^1\text{H}$  NMR of PHM-1.

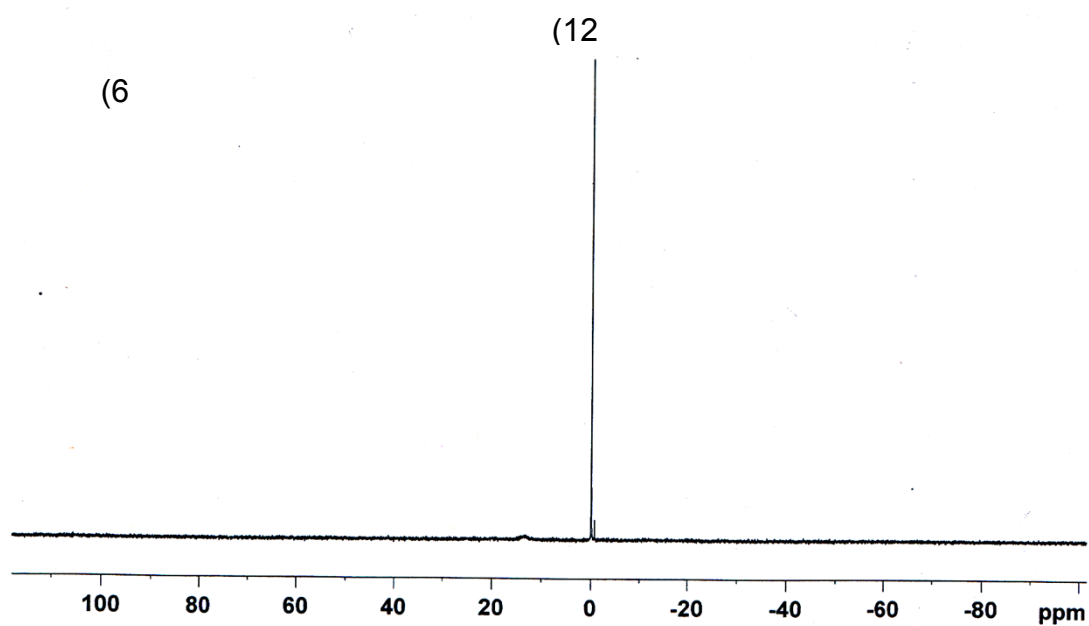

Figure S4b.  $^{31}\text{P}$  NMR of PHM-1.

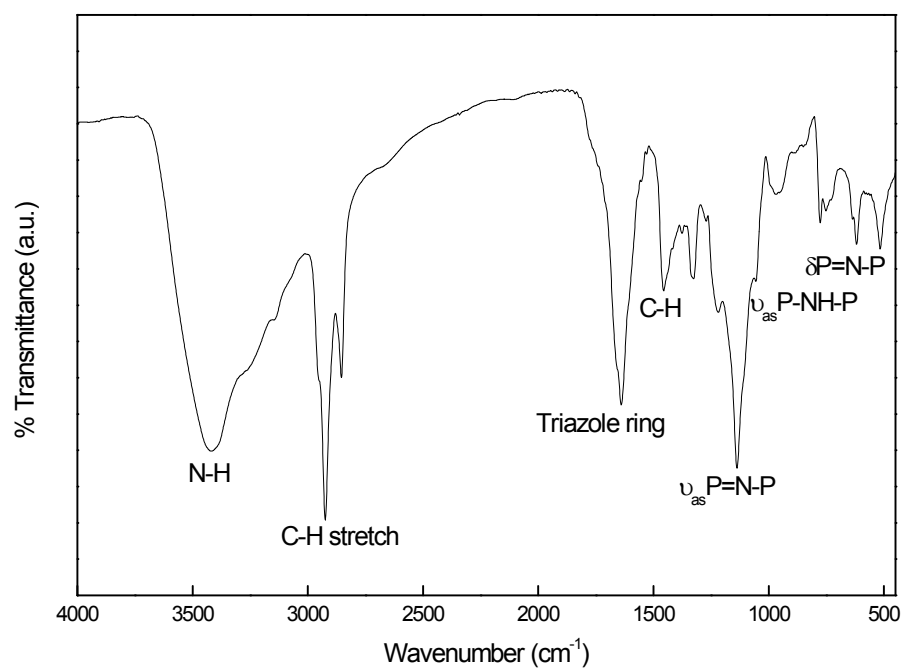

**Figure S5. FT-IR spectrum of PHM-1.**

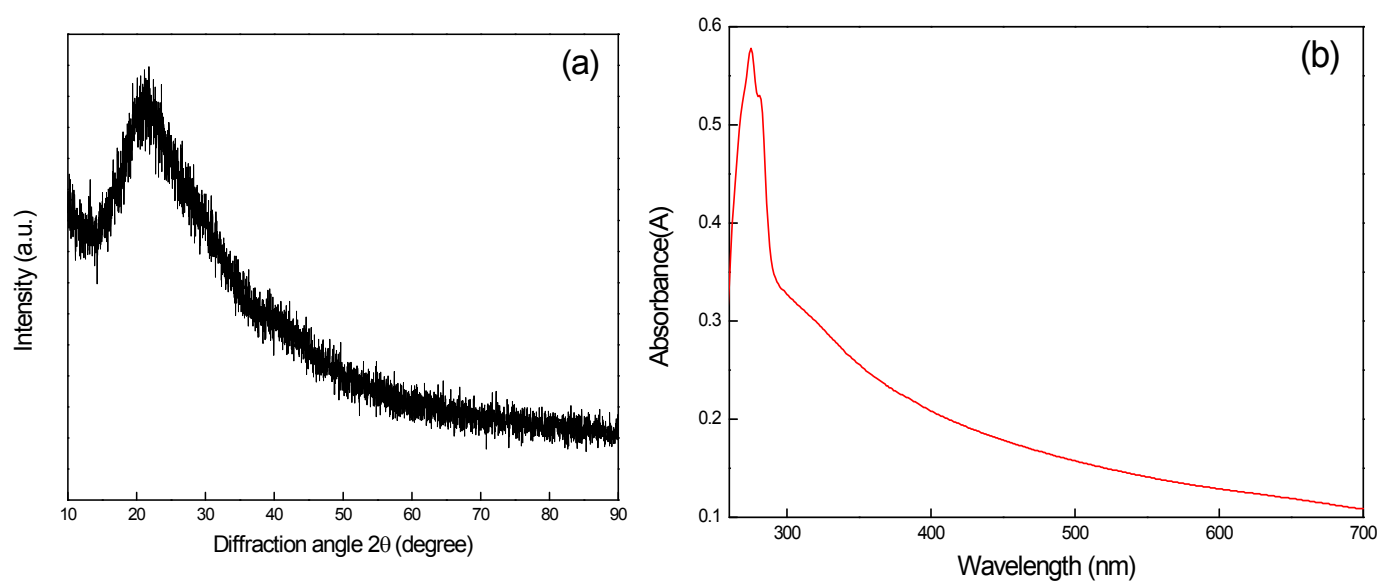

**Figure S6. (a) XRD pattern and (b) UV-vis spectrum of PHM-1.**

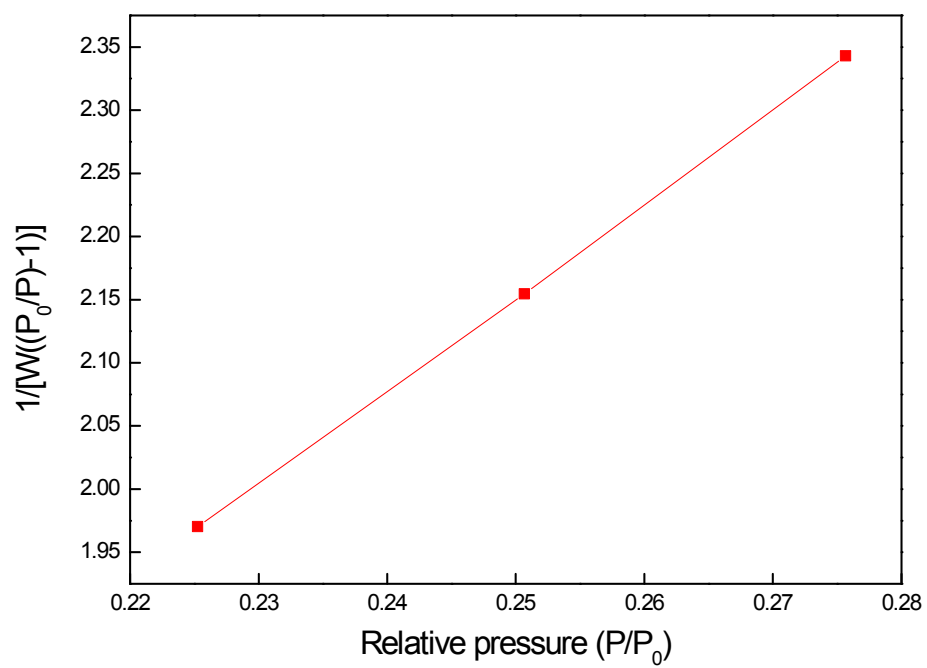

**Figure S7. Multi-Point BET plot of PHM-1.**
